# Supplementary material
Source: publisher site journal article supplement (https://www.dovepress.com/article/341953)
Supplement: Supplementary file 2 [file 30_Dec_2021_341953_S2.pdf › 30_Dec_2021_341953_S2.pdf]

## Supplementary 2 - The decision tree to identify the Critical Control Points (CCPs) for the preoperative management of malnutrition and sarcopenia in elective orthopedic surgery

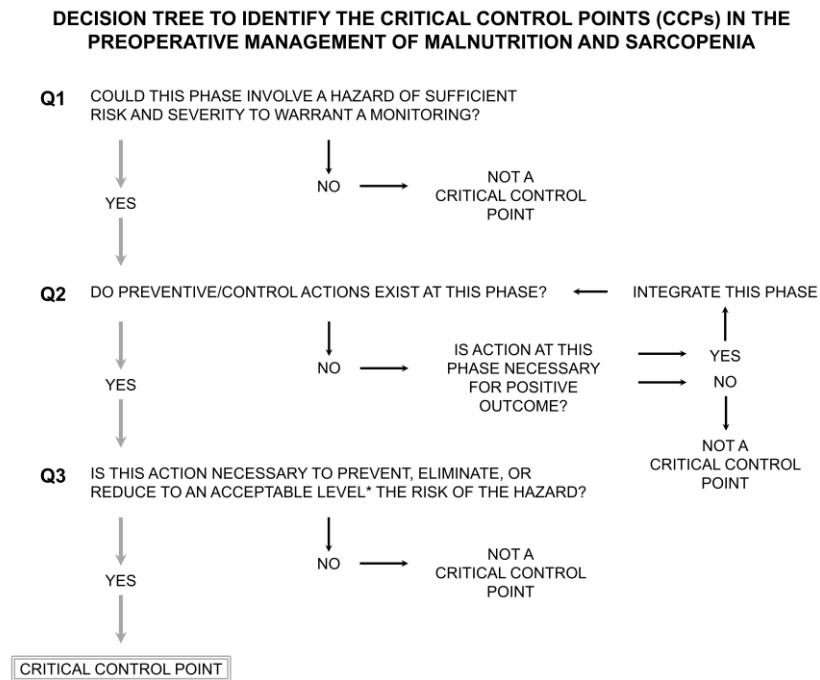

\* ACCEPTABLE OR UNACCEPTABLE RANGES ARE TO BE DEFINED ACCORDING TO THE OUTCOME

The decision tree is a sequence of questions and answers that characterizes the nature of each phase in a process based on the existence of potential hazards. It is not recommended to simply rely on questions Q1, Q2, and Q3 (in sequence), but it preferable to consider the broad spectrum of the process, in order to avoid the insertion of repetitive procedures. The answers from the decision tree indicate the modification of the entire flowchart if a condition is not met.
