# Supplementary material
Source: publisher site journal article supplement (https://www.dovepress.com/article/341953)
Supplement: Supplementary file 3 [file 30_Dec_2021_341953_S3.pdf › 30_Dec_2021_341953_S3.pdf]

## Supplementary 3 - Infographic of the prototypical phenotype of patient undergoing elective orthopedic surgery

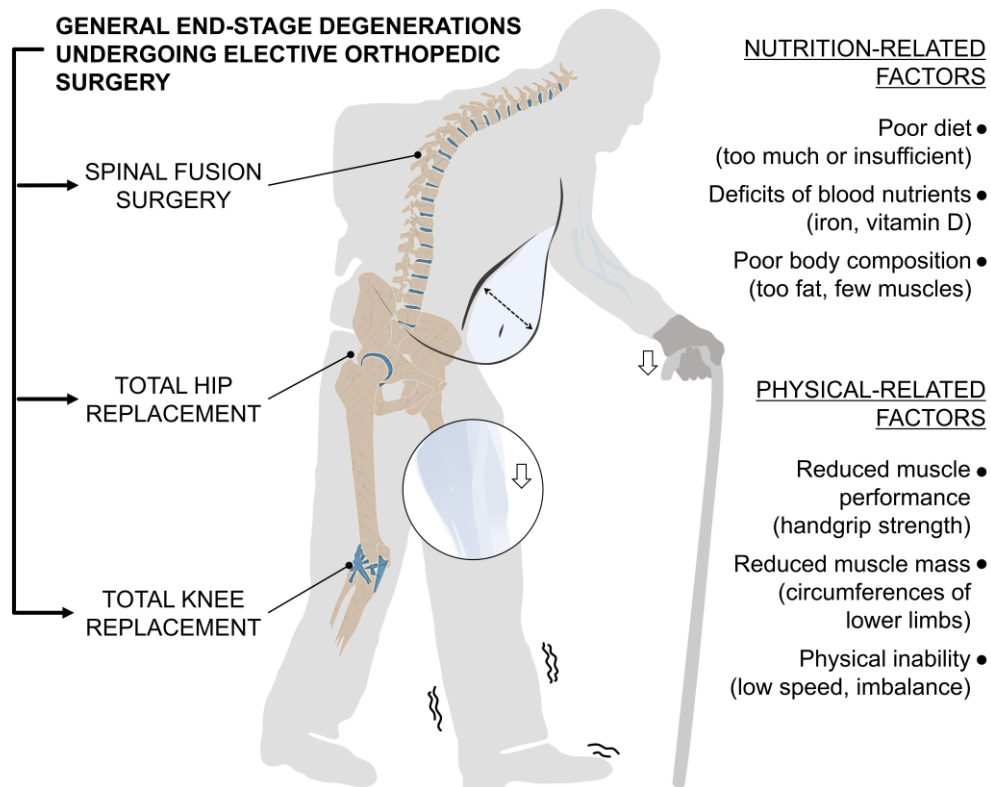

In patients undergoing elective orthopedic surgery, such as total hip replacement, total knee replacement, or spine surgery, many nutritional and physical hazardous conditions may be present. If detected, these factors should be appropriately managed through a methodical approach of HACCP-derived prehabilitation.
